# Supplementary material for: Enhanced Electroluminescence from a Silicon Nanocrystal/Silicon Carbide Multilayer Light-Emitting Diode
Source: MDPI journal article supplement (doi:10.3390/nano13061109), 2023-03-20
Supplement: s1 [file s1]

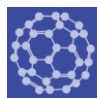

# Enhanced Electroluminescence from a Silicon Nanocrystal/Silicon Carbide Multilayer Light-Emitting Diode

Teng Sun <sup>1</sup>, Dongke Li <sup>1,2</sup>, Jiaming Chen <sup>1</sup>, Yuhao Wang <sup>1</sup>, Junnan Han <sup>1</sup>, Ting Zhu <sup>1</sup>, Wei Li <sup>1</sup>, Jun Xu <sup>1,\*</sup> and Kunji Chen <sup>1</sup>

<sup>1</sup> School of Electrical Science and Engineering, Collaborative Innovation Centre of Advanced Microstructures, Jiangsu Provincial Key Laboratory of Advanced Photonic and Electrical Materials, Nanjing University, Nanjing 210000, China

<sup>2</sup> ZJU-Hangzhou Global Scientific and Technological Innovation Centre, School of Materials Science and Engineering, Zhejiang University, Hangzhou 311200, China

\* Correspondence: author: junxu@nju.edu.cn

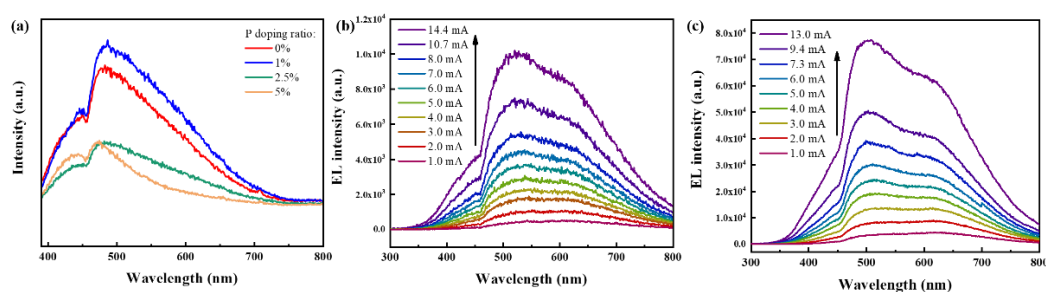

**Figure S1.** Original detected spectra of (a) PL spectra with various doping ratios, (b) EL spectra of un-doped Si NCs LED and (c) EL spectra of 1% P-doped Si NCs LED.

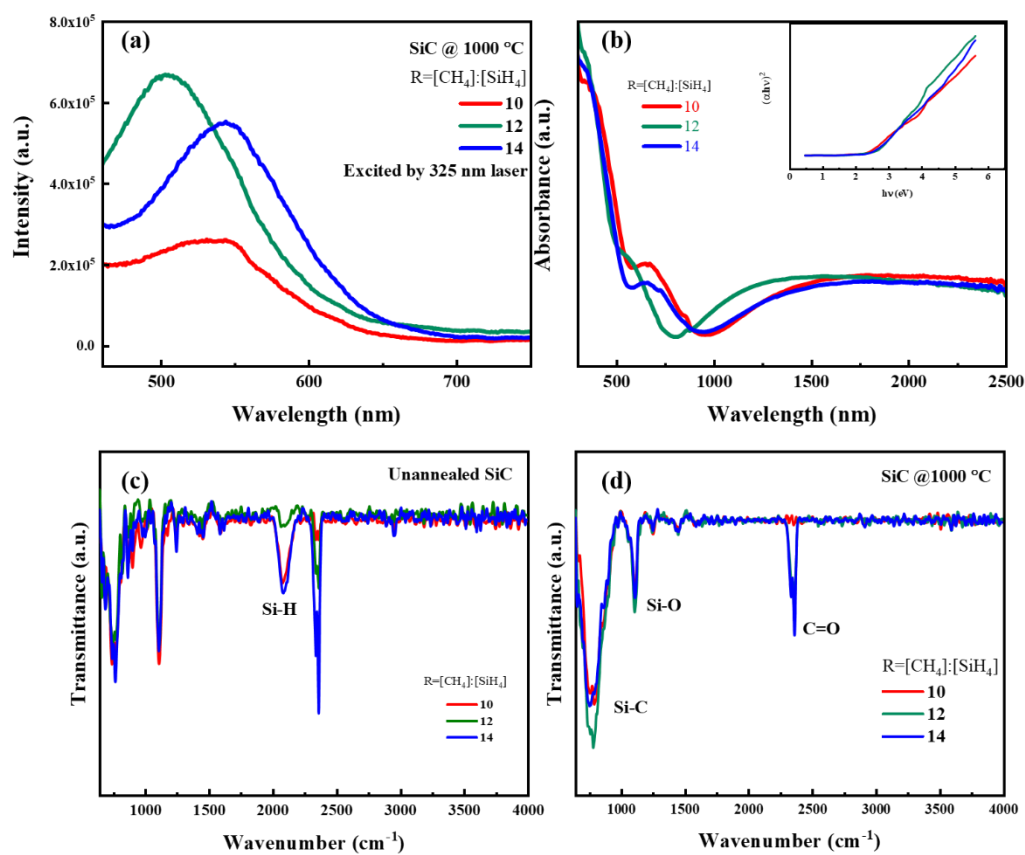

**Figure S2.** (a) PL spectrum of unannealed SiC (R = 10) excited by 325 nm laser; (b) Absorption spectra of annealed SiC with various R. Inset is the Tauc's plot against photon energy; FTIR spectra of unannealed (c) and annealed (d) SiC with various R.

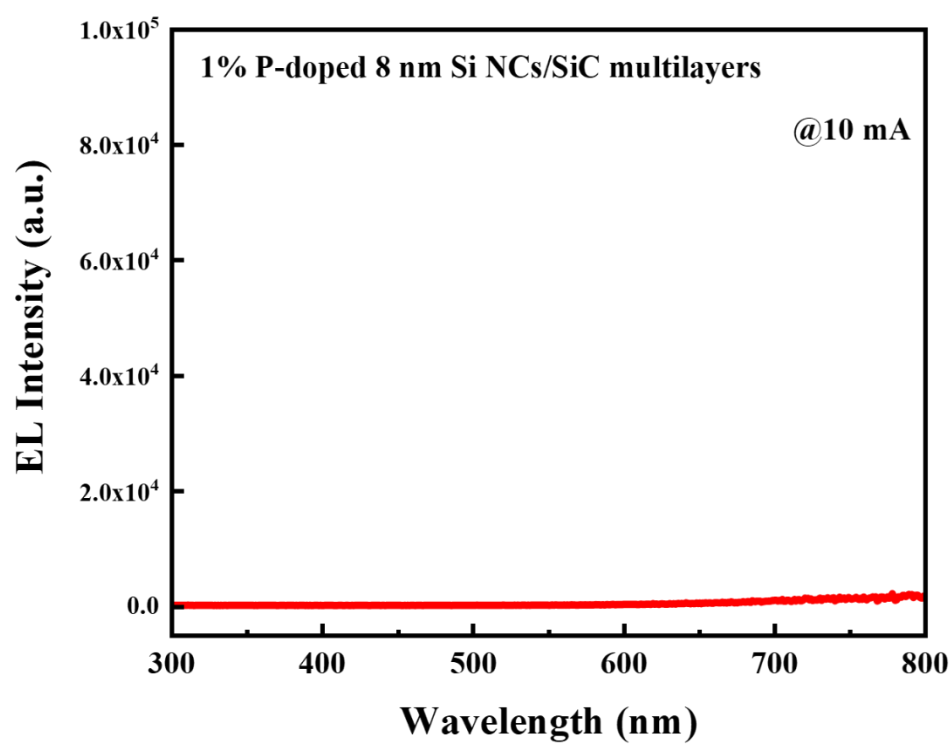

**Figure S3.** EL spectrum of 1% P-doped 8 nm sized Si NCs/SiC multilayers at 10 mA applied current.
